# Supplementary material
Source: publisher figshare collection journal article supplement (https://acs.figshare.com/ndownloader/files/3699094)
Supplement: Supplementary file 1 [file 3699094]

**Supporting Information**  
**Factor Analysis of Conformations and NMR Signals of Rotaxanes:**  
**AIMD and Polarizable MD Simulations**

Pingying Liu<sup>1,2</sup>, Wei Li<sup>\*1</sup>, Zigui Kan<sup>1</sup>, Hui Sun<sup>1</sup>, Jing Ma<sup>\*1</sup>

<sup>1</sup>School of Chemistry and Chemical Engineering, Key Laboratory of Mesoscopic Chemistry of MOE, Nanjing University, Nanjing 210093, People's Republic of China

<sup>2</sup>School of Materials Science and Engineering, Jingdezhen Ceramic Institute, Jingdezhen 333403, China

\*Corresponding author: majing@nju.edu.cn, Fax: 86-25-83686131, Tel: 86-25-89687408

\*Corresponding author: [wli@nju.edu.cn](mailto:wli@nju.edu.cn), Tel: 86-25-89687052

## Contents

|                                                                                                                                                                                                    |            |
|----------------------------------------------------------------------------------------------------------------------------------------------------------------------------------------------------|------------|
| 1. <b>Figure S1.</b> (a) Convergence behaviors of calculated <sup>1</sup> H chemical shifts of amide protons for the pseudorotaxane in vacuum. (b) Structural variations with the time evolutions. | <b>S2</b>  |
| 2. <b>Figure S2.</b> Comparison of PW91-based AIMD with the GEBF-M06-2X AIMD and the force field based MD simulations.                                                                             | <b>S3</b>  |
| 3. <b>Figure S3.</b> Flow chat of polar-FF MD simulations.                                                                                                                                         | <b>S4</b>  |
| 4. <b>Figure S4.</b> Potential energies varied as a function of time for the pseudorotaxane.                                                                                                       | <b>S5</b>  |
| 5. <b>Table S1.</b> Correlation matrix of PC-FA method.                                                                                                                                            | <b>S6</b>  |
| 6. <b>Table S2.</b> Total variance explained result of PC-FA method.                                                                                                                               | <b>S6</b>  |
| 7. <b>Table S3.</b> Component score coefficient matrix of PC-FA method.                                                                                                                            | <b>S6</b>  |
| 8. <b>Figure S5.</b> Comparison of the number of H-bonds as a function of MD simulation time using four different molecular dynamics methods for pseudorotaxane in vacuum.                         | <b>S7</b>  |
| 9. <b>Figure S6.</b> The first principle component scores of ring-rod contacting geometries for pseudorotaxane in vacuum using polar FF+AIMD method.                                               | <b>S8</b>  |
| 10. <b>Figure S7.</b> Fluctuations of end-to-end lengths of rod for the pseudorotaxane using non-polar and polar FF MD simulations in vacuum and in solution.                                      | <b>S9</b>  |
| 11. <b>Figure S8.</b> Variation of number of solvents around the solute using (a) non-polar FF and (b) polar FF-based MD simulations in solution for [2]rotaxane.                                  | <b>S10</b> |
| 12. <b>Figure S9.</b> Distributions of N···O lengths and N-H···O angles for pseudorotaxane in vacuum and in solution.                                                                              | <b>S11</b> |
| 13. <b>Figure S10.</b> PC1 score plots for (a) pseudorotaxane, and (b) [2]rotaxane using non-polar and polar FF MD simulations in vacuum and in solution.                                          | <b>S12</b> |

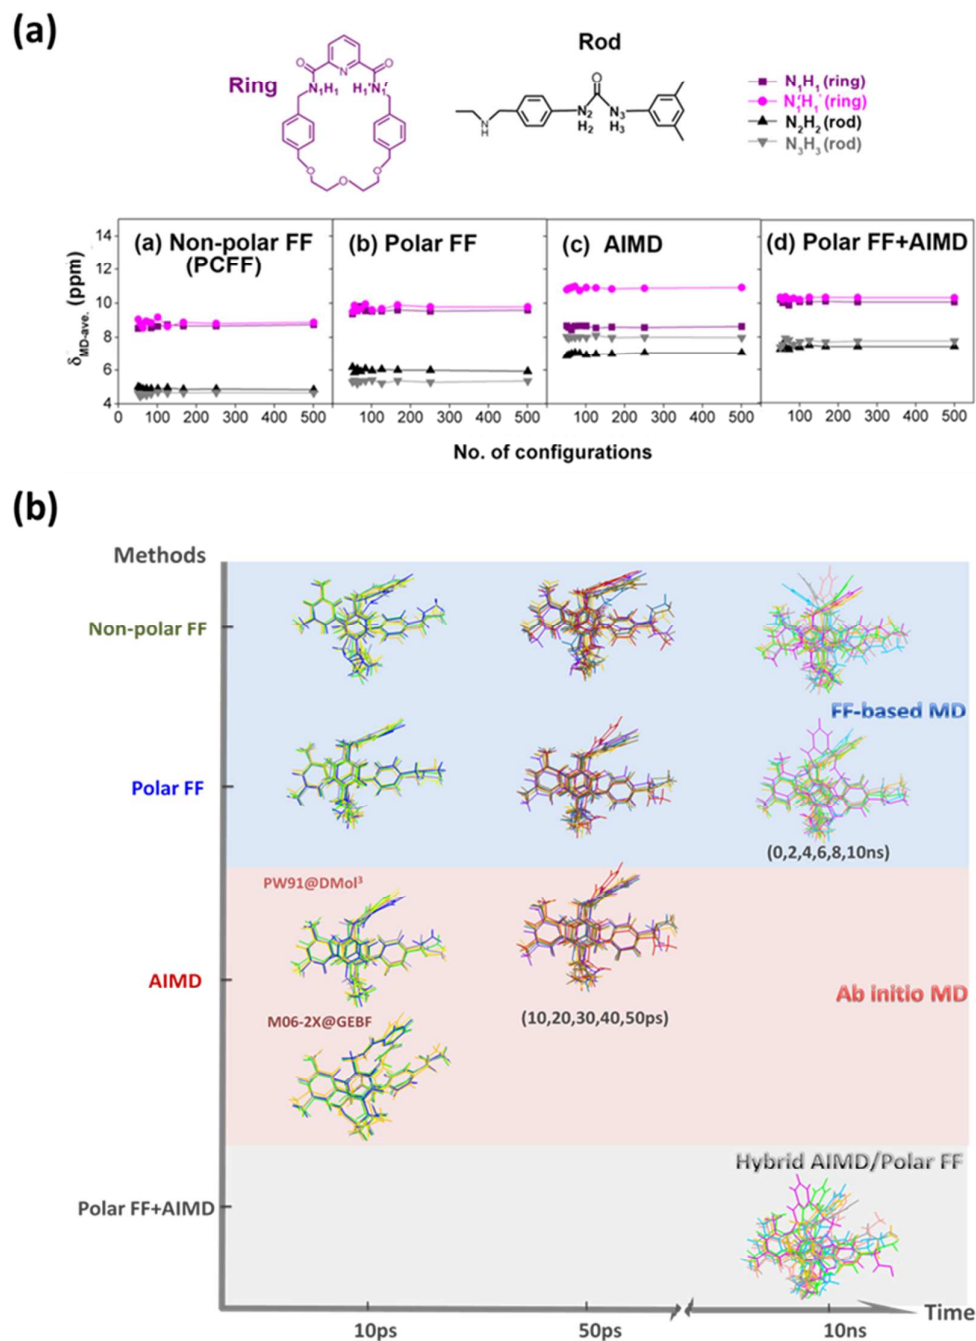

**Figure S1.** (a) Convergence behaviors of calculated  $^1\text{H}$  chemical shifts of amide protons for the pseudorotaxane in vacuum. (b) Structural variations with the time evolutions.

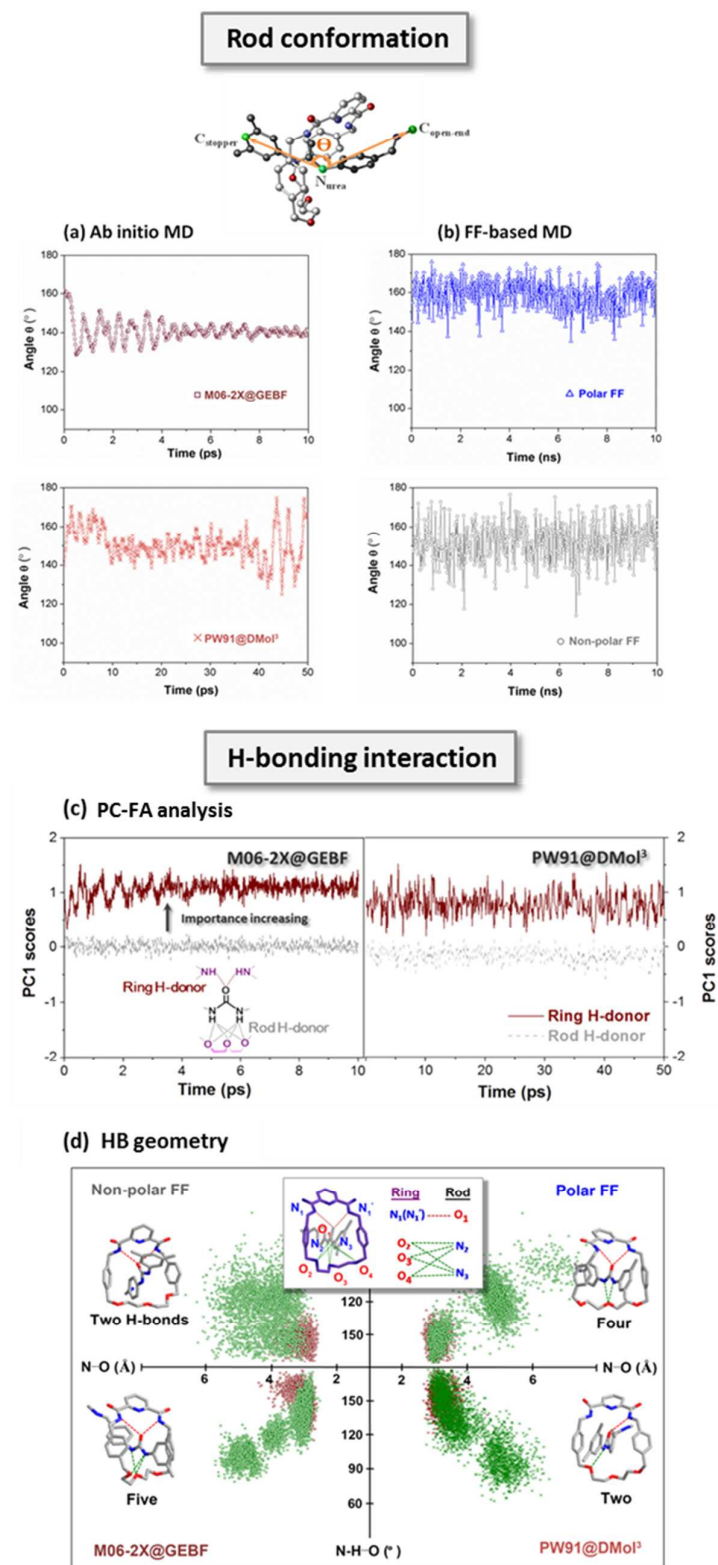

**Figure S2.** The comparison of PW91-based AIMD with the GEBF-M06-2X AIMD and the force field based MD simulations.

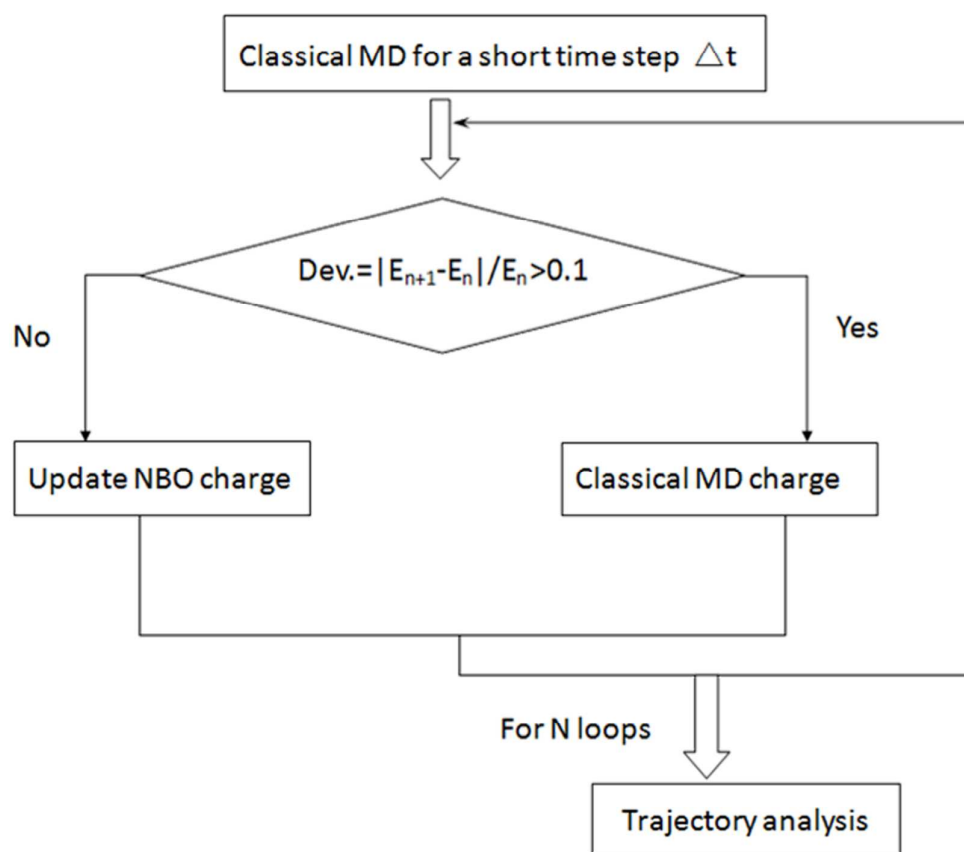

**Figure S3.** Flow chart of polar-FF MD simulations.

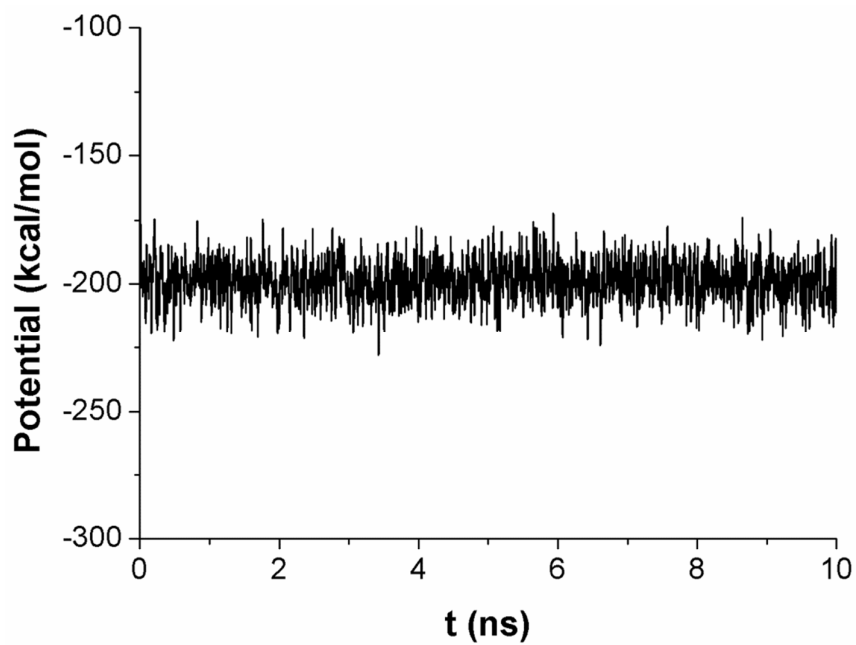

**Figure S4.** Potential energies (kcal/mol) varied as a function of time for the pseudorotaxane. The molecular dynamics simulation are carried out at 298.15K by using PCFF with NBO charges, updated every 5ps.

**Table S1.** Correlation matrix of factor analysis using principal component method.

|                                               | $\angle\text{N-H}\cdots\text{O}$ | $r_{\text{N}\cdots\text{O}}$ | $r_{\text{N-H stretch}}$ | $r_{\text{H}\cdots\text{O}}$ | $r_{\text{N-H}} / r_{\text{H}\cdots\text{O}}$ |
|-----------------------------------------------|----------------------------------|------------------------------|--------------------------|------------------------------|-----------------------------------------------|
| $\angle\text{N-H}\cdots\text{O}$              | 1.000                            | -0.656                       | 0.037                    | -0.752                       | 0.711                                         |
| $r_{\text{N}\cdots\text{O}}$                  | -0.656                           | 1.000                        | -0.170                   | 0.971                        | -0.930                                        |
| $r_{\text{N-H stretch}}$                      | 0.037                            | -0.170                       | 1.000                    | -0.172                       | 0.291                                         |
| $r_{\text{H}\cdots\text{O}}$                  | -0.752                           | 0.971                        | -0.172                   | 1.000                        | -0.948                                        |
| $r_{\text{N-H}} / r_{\text{H}\cdots\text{O}}$ | 0.711                            | -0.930                       | 0.291                    | -0.948                       | 1.000                                         |

**Table S2.** Total variance explained result of factor analysis using principal component method.

| Component | Initial eigenvalues |               |              | Extraction Sums of Squared Loadings |               |              |
|-----------|---------------------|---------------|--------------|-------------------------------------|---------------|--------------|
|           | Total               | % of Variance | Cumulative % | Total                               | % of Variance | Cumulative % |
| 1         | 3.546               | 70.916        | 70.916       | 3.546                               | 70.916        | 70.916       |
| 2         | 0.991               | 7.700         | 90.735       |                                     |               |              |
| 3         | 0.385               | 1.191         | 98.434       |                                     |               |              |
| 4         | 0.060               | 0.375         | 9.625        |                                     |               |              |
| 5         | 0.019               | 0.018         | 100.000      |                                     |               |              |

**Table S3.** Component score coefficient matrix of factor analysis using principal component method.

|                                               | Principal Component 1 |
|-----------------------------------------------|-----------------------|
| $\angle\text{N-H}\cdots\text{O}$              | 0.229                 |
| $r_{\text{N}\cdots\text{O}}$                  | -0.270                |
| $r_{\text{N-H stretch}}$                      | 0.071                 |
| $r_{\text{H}\cdots\text{O}}$                  | -0.277                |
| $r_{\text{N-H}} / r_{\text{H}\cdots\text{O}}$ | 0.274                 |

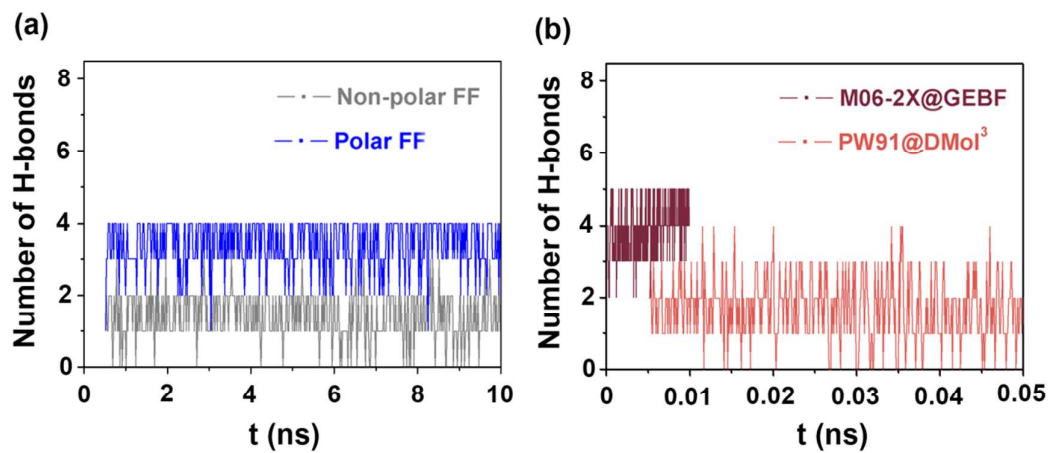

**Figure S5.** Comparison of the number of H-bonds as a function of MD simulation time using four different molecular dynamics methods for pseudorotaxane in vacuum.

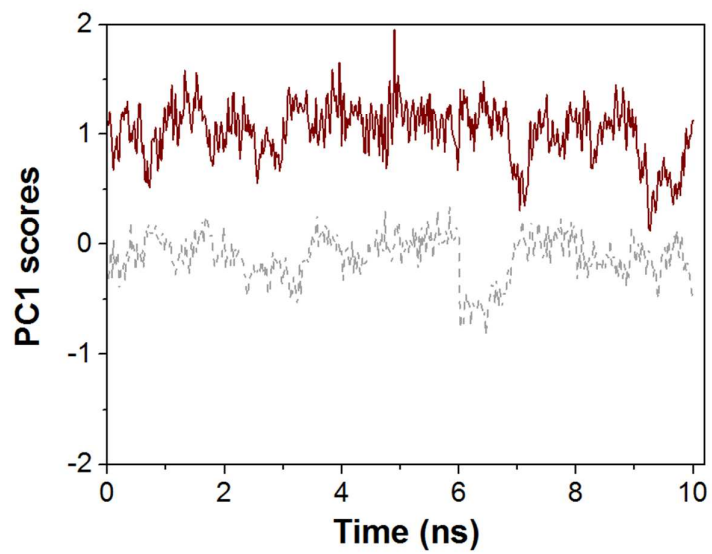

**Figure S6.** The first principle component scores of ring-rod contacting geometries for pseudorotaxane in vacuum using polar FF+AIMD method.



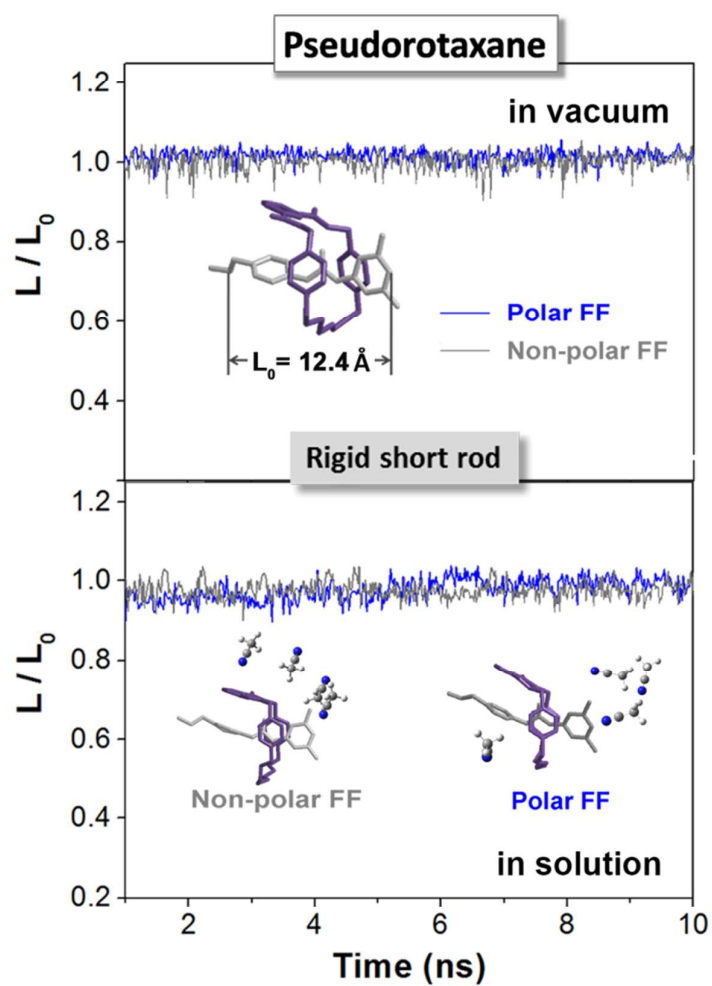

**Figure S7.** Fluctuations of end-to-end lengths of rod for pseudorotaxane using non-polar and polar FF MD simulations in vacuum and in solution.

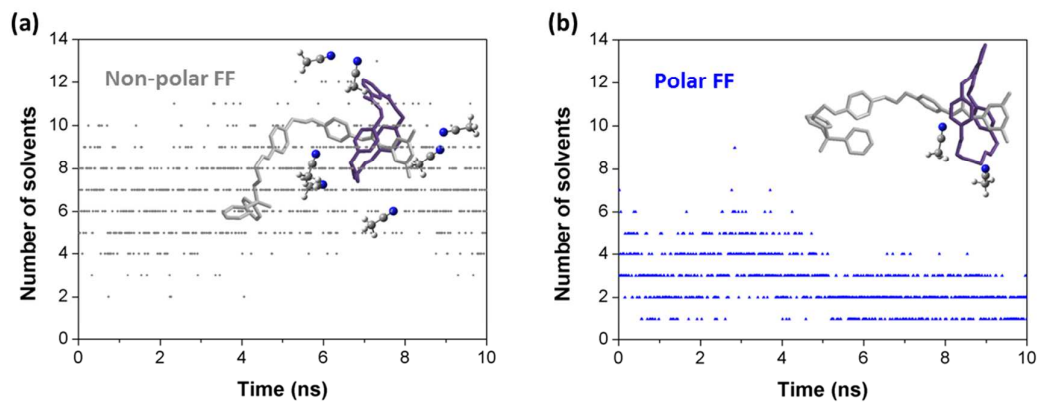

**Figure S8.** Variation of number of solvents around the solute with the distance cutoff ( $< 9 \text{ \AA}$ ) using (a) non-polar FF and (b) polar FF-based MD simulations in solution for [2]rotaxane.

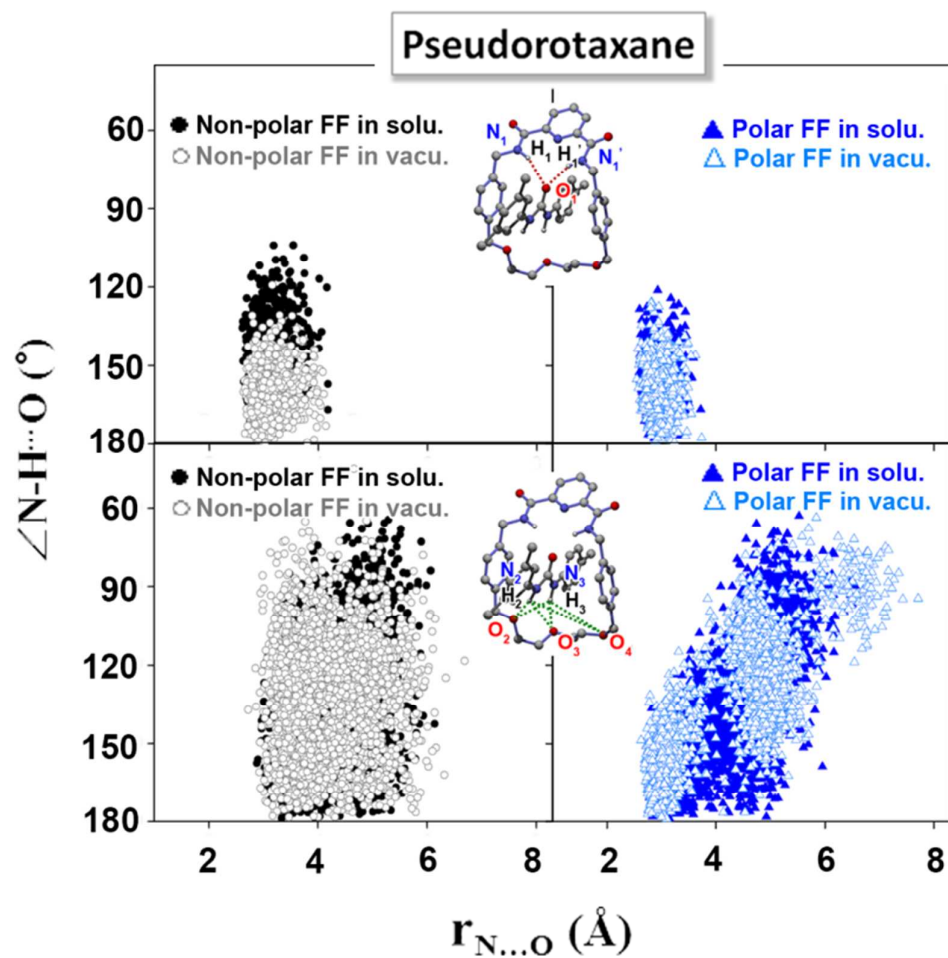

**Figure S9.** Distributions of  $N...O$  lengths and  $N-H...O$  angles for pseudorotaxane in vacuum and in solution.

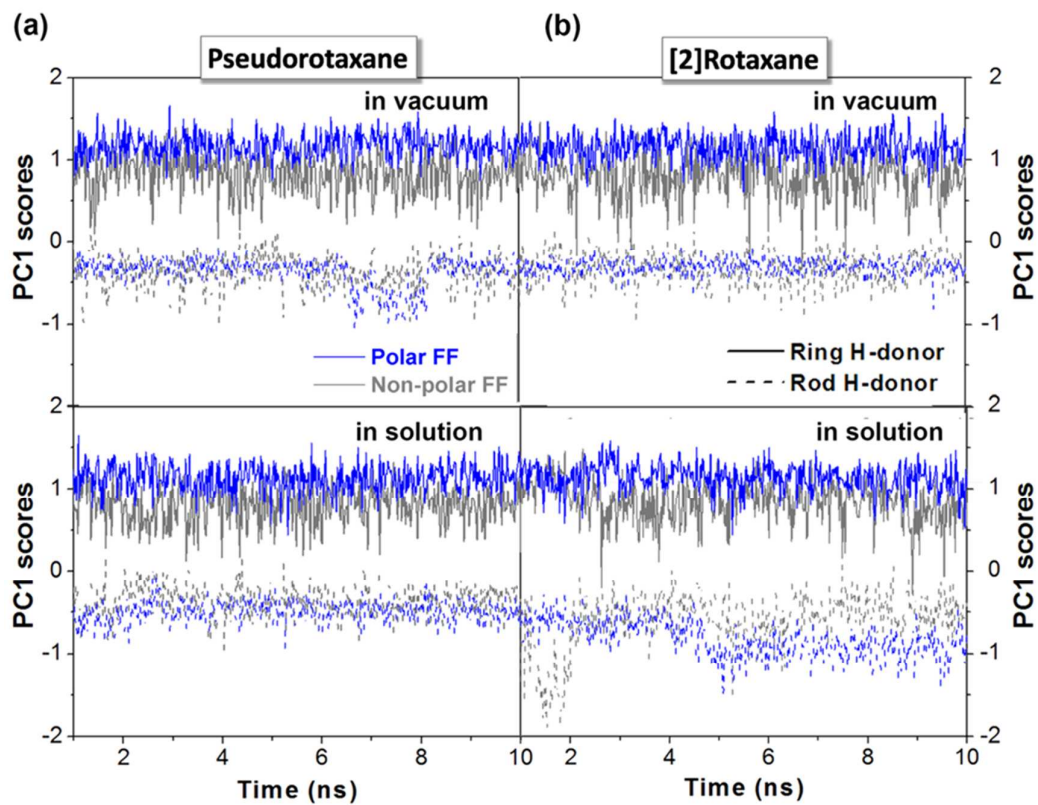

**Figure S10.** PC1 score plots for (a) pseudorotaxane, and (b) [2]rotaxane using non-polar and polar FF MD simulations in vacuum and in solution.
